# Supplementary material for: Mapping Malaria Vectors in West Africa: Drone Imagery and Deep-Learning Analysis for Targeted Vector Surveillance
Source: Preprints.org preprint supplement (doi:10.20944/preprints202303.0494.v1), 2023-03-28
Supplement: Supplementary file 1 [file supplementary]

# Supplementary Materials: Deep Learning Image Analysis Tools to Identify Malaria Vector Habitats in West Africa

Fedra Trujillano<sup>1</sup>, Gabriel Jimenez Garay<sup>1</sup>, Hugo Alatrasta-Salas<sup>2,3\*</sup>, Isabel Byrne<sup>4</sup>, Miguel Nunez-del-Prado<sup>3,5</sup>, Kallista Chan<sup>4,7</sup>, Edgar Manrique<sup>1</sup>, Emilia Johnson<sup>8</sup>, Nombre Apollinaire<sup>9</sup>, Pierre Kouame Kouakou<sup>10</sup>, Achille Welbeck Oumbouke<sup>4,11</sup>, Alfred Tiono<sup>7</sup>, Moussa Guelbeogo<sup>7</sup>,, Jo Lines<sup>4,7</sup>, Gabriel Carrasco-Escobar<sup>1,12</sup>, Kimberly Fornace<sup>7,8,13</sup>

| Class                    | CV   | FP   | FN   | TN   | FP   | Precision | Recall | Dice        |
|--------------------------|------|------|------|------|------|-----------|--------|-------------|
| Vegetated water body     | 1    | 0.31 | 0.17 | 0.19 | 0.33 | 0.52      | 0.66   | 0.54        |
|                          | 2    | 0.16 | 0.17 | 0.20 | 0.47 | 0.73      | 0.73   | 0.65        |
|                          | 3    | 0.31 | 0.06 | 0.16 | 0.47 | 0.60      | 0.89   | <b>0.67</b> |
|                          | Avg. | 0.26 | 0.13 | 0.18 | 0.42 | 0.61      | 0.76   | 0.62        |
| Tillage                  | 1    | 0.11 | 0.04 | 0.18 | 0.67 | 0.86      | 0.94   | <b>0.88</b> |
|                          | 2    | 0.09 | 0.11 | 0.20 | 0.59 | 0.86      | 0.84   | 0.81        |
|                          | 3    | 0.11 | 0.06 | 0.18 | 0.65 | 0.85      | 0.92   | 0.86        |
|                          | Avg. | 0.10 | 0.07 | 0.19 | 0.64 | 0.86      | 0.90   | 0.85        |
| Roads                    | 1    | 0.07 | 0.10 | 0.63 | 0.20 | 0.74      | 0.65   | <b>0.66</b> |
|                          | 2    | 0.06 | 0.09 | 0.69 | 0.16 | 0.76      | 0.65   | 0.66        |
|                          | 3    | 0.20 | 0.17 | 0.44 | 0.19 | 0.50      | 0.53   | 0.46        |
|                          | Avg. | 0.11 | 0.12 | 0.59 | 0.18 | 0.67      | 0.60   | 0.59        |
| Non-vegetated water body | 1    | 0.01 | 0.75 | 0.09 | 0.15 | 0.94      | 0.16   | 0.22        |
|                          | 2    | 0.36 | 0.01 | 0.01 | 0.62 | 0.64      | 0.98   | <b>0.74</b> |
|                          | 3    | 0.44 | 0.00 | 0.01 | 0.55 | 0.56      | 0.99   | 0.68        |
|                          | Avg. | 0.27 | 0.26 | 0.03 | 0.44 | 0.71      | 0.63   | 0.55        |
| Crops                    | 1    | 0.09 | 0.09 | 0.17 | 0.65 | 0.87      | 0.88   | 0.84        |
|                          | 2    | 0.12 | 0.04 | 0.15 | 0.68 | 0.85      | 0.94   | 0.87        |
|                          | 3    | 0.07 | 0.07 | 0.17 | 0.69 | 0.90      | 0.91   | <b>0.88</b> |
|                          | Avg. | 0.10 | 0.07 | 0.17 | 0.67 | 0.87      | 0.91   | 0.86        |
| Building                 | 1    | 0.04 | 0.07 | 0.61 | 0.29 | 0.88      | 0.80   | <b>0.82</b> |
|                          | 2    | 0.05 | 0.08 | 0.60 | 0.27 | 0.85      | 0.77   | 0.75        |
|                          | 3    | 0.08 | 0.05 | 0.58 | 0.29 | 0.80      | 0.86   | 0.81        |
|                          | Avg. | 0.06 | 0.07 | 0.60 | 0.28 | 0.84      | 0.81   | 0.79        |

Table 1: Results of the classification process using the U-Net architecture used for 512x512 pixels patch size, where the best fold is reported in bold font. The results are reported in terms of cross validation (CV), false positives (FP), false negatives (FN), true negatives (TN), true positives (TP), precision, recall, and Dice.

| Class                    | CV   | FP   | FN   | TN   | TP   | Precision | Recall | Dice        |
|--------------------------|------|------|------|------|------|-----------|--------|-------------|
| Vegetated water body     | 1    | 0.44 | 0.01 | 0.03 | 0.52 | 0.54      | 0.98   | 0.66        |
|                          | 2    | 0.20 | 0.07 | 0.31 | 0.43 | 0.69      | 0.84   | <b>0.73</b> |
|                          | 3    | 0.07 | 0.16 | 0.29 | 0.48 | 0.81      | 0.67   | 0.66        |
|                          | Avg. | 0.24 | 0.08 | 0.21 | 0.48 | 0.68      | 0.83   | 0.68        |
| Non-vegetated water body | 1    | 0.08 | 0.51 | 0.37 | 0.05 | 0.36      | 0.08   | 0.11        |
|                          | 2    | 0.07 | 0.06 | 0.03 | 0.84 | 0.92      | 0.93   | <b>0.91</b> |
|                          | 3    | 0.08 | 0.49 | 0.30 | 0.13 | 0.71      | 0.21   | 0.28        |
|                          | Avg. | 0.08 | 0.35 | 0.23 | 0.34 | 0.66      | 0.41   | 0.43        |
| Crops                    | 1    | 0.05 | 0.26 | 0.24 | 0.45 | 0.77      | 0.58   | 0.59        |
|                          | 2    | 0.05 | 0.26 | 0.24 | 0.44 | 0.77      | 0.58   | <b>0.59</b> |
|                          | 3    | 0.03 | 0.54 | 0.31 | 0.12 | 0.62      | 0.16   | 0.18        |
|                          | Avg. | 0.04 | 0.35 | 0.26 | 0.34 | 0.72      | 0.44   | 0.45        |
| Building                 | 1    | 0.02 | 0.05 | 0.64 | 0.29 | 0.93      | 0.84   | <b>0.86</b> |
|                          | 2    | 0.03 | 0.06 | 0.62 | 0.30 | 0.91      | 0.83   | 0.85        |
|                          | 3    | 0.04 | 0.06 | 0.61 | 0.30 | 0.86      | 0.83   | 0.81        |
|                          | Avg. | 0.03 | 0.06 | 0.62 | 0.30 | 0.90      | 0.83   | 0.84        |

Table 2: Results of the classification process using the Attention U-Net architecture used for 512x512 pixels patch size, where the best fold is reported in bold font. The results are reported in terms of cross validation (CV), false positives (FP), false negatives (FN), true negatives (TN), true positives (TP), precision, recall, and Dice.

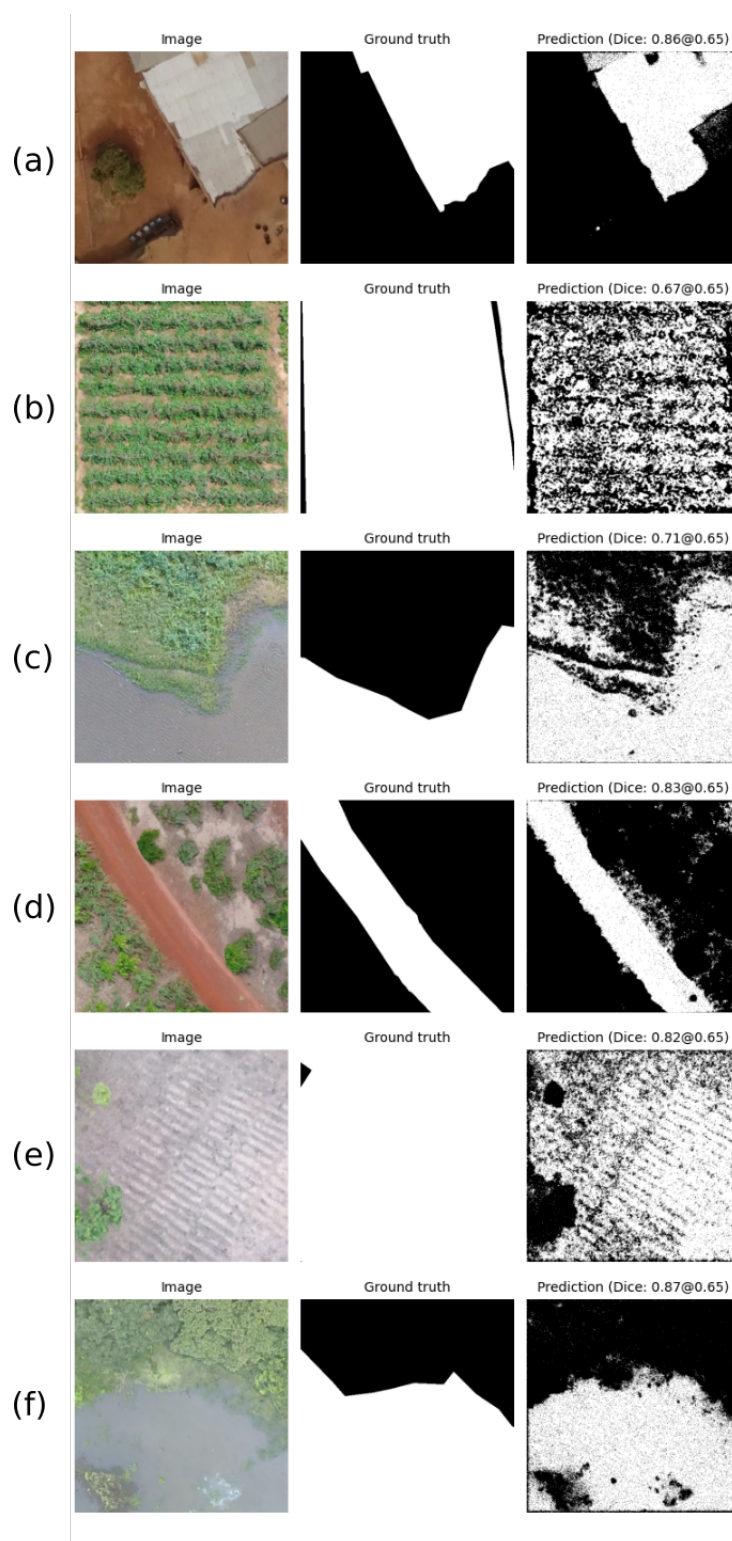

**Figure S1.** Predictions using the UNet architecture for patches of size  $512 \times 512$  pixels. (a) Buildings. (b) Crops. (c) Non-vegetated water bodies. (d) Roads. (e) Tillage. (f) Vegetated water bodies.

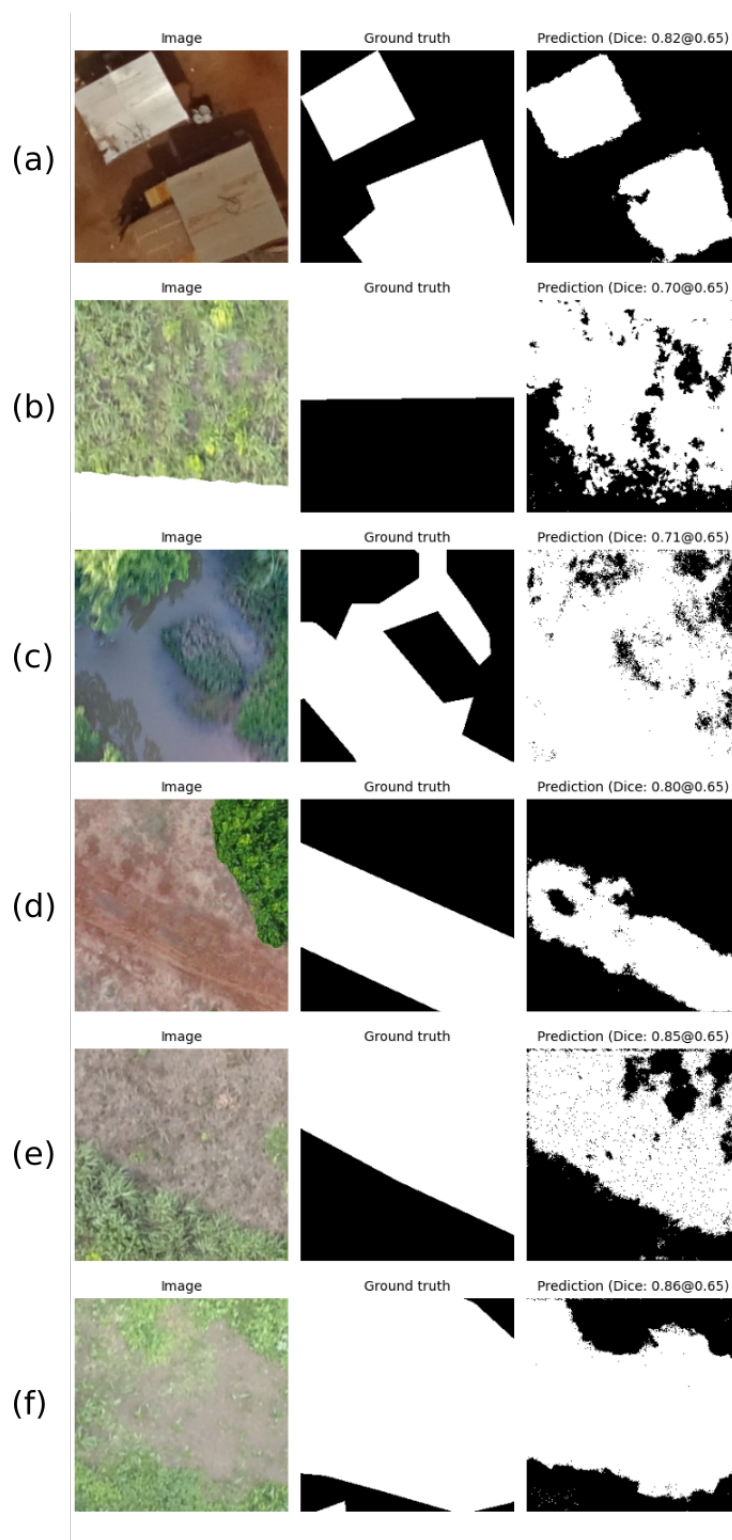

**Figure S2.** Predictions using the Attention U-Net architecture for patches of size  $256 \times 256$  pixels. (a) Buildings. (b) Crops. (c) Non-vegetated water bodies. (d) Roads. (e) Tillage. (f) Vegetated water bodies.
